# Supplementary material
Source: PubMed Central journal article supplement (PMC5591578)
Supplement: NIHMS901529-supplement-1.pdf [file NIHMS901529-supplement-1.pdf]

## Supplemental Figures

### Dissecting the Role of Myeloid and Mesenchymal Fibroblasts in Age-dependent Cardiac Fibrosis

JoAnn Trial<sup>1</sup>, Celia Pena Heredia<sup>1</sup>, George E. Taffet<sup>1</sup>, Mark L. Entman<sup>1,2</sup>, Katarzyna  
A. Cieslik<sup>1\*</sup>

<sup>1</sup>Division of Cardiovascular Sciences and the DeBakey Heart Center, Department of  
Medicine, Baylor College of Medicine, Houston, TX and <sup>2</sup>Houston Methodist, Houston,  
TX

\*Corresponding Author:

Katarzyna A. Cieslik, PhD  
Baylor College of Medicine  
Department of Medicine  
Division of Cardiovascular Sciences  
One Baylor Plaza, M.S. BCM620  
Houston, Texas 77030  
Phone: 713-798-1952  
Fax: 713-796-6471

**Supplemental Table 1. Analysis of the heart function in mice of various genetic backgrounds.**

Aged denotes 21-124 month-old mice. N = 10 mice per aged B6J, aged MCP-1KO, aged B6N group respectively. Data presented as a mean value  $\pm$  SEM. \* denotes  $p < 0.05$  when compared with B6J group.

| Indices                         | Aged B6J             | Aged MCP-1KO         | Aged B6N             |
|---------------------------------|----------------------|----------------------|----------------------|
| Weight [g]                      | 36.327 $\pm$ 1.566   | 44.353 $\pm$ 2.755   | 45.86 $\pm$ 1.937    |
| Heart Rate [bpm]                | 424.672 $\pm$ 15.024 | 417.946 $\pm$ 14.222 | 424.172 $\pm$ 20.205 |
| <b>Systolic Parameters</b>      |                      |                      |                      |
| LVID;d [mm]                     | 4.658 $\pm$ 0.089    | 4.559 $\pm$ 0.118    | 5.146 $\pm$ 0.064*   |
| LVPW;d [mm]                     | 0.731 $\pm$ 0.028    | 0.851 $\pm$ 0.033*   | 0.811 $\pm$ 0.034    |
| Volume;d [ $\mu$ l]             | 104.16 $\pm$ 4.043   | 97.282 $\pm$ 5.329   | 130.875 $\pm$ 4.555* |
| Fractional Shortening [%]       | 24.421 $\pm$ 0.787   | 25.665 $\pm$ 0.725   | 22.251 $\pm$ 0.707   |
| Cardiac Output [ml/min]         | 21.804 $\pm$ 0.923   | 17.644 $\pm$ 0.925*  | 22.127 $\pm$ 1.567   |
| Peak Velocity [cm/s]            | 89.746 $\pm$ 4.929   | 100.933 $\pm$ 10.779 | 105.012 $\pm$ 7.749  |
| <b>Diastolic Parameters</b>     |                      |                      |                      |
| E-Peak Velocity [cm/s]          | 72.582 $\pm$ 2.711   | 70.824 $\pm$ 3.603   | 71.096 $\pm$ 3.720   |
| E/A Peak Velocity Ratio         | 1.328 $\pm$ 0.057    | 1.416 $\pm$ 0.058    | 1.623 $\pm$ 0.124*   |
| Isovolumic Relaxation Time [ms] | 20.811 $\pm$ 1.173   | 21.422 $\pm$ 1.139   | 20.275 $\pm$ 0.958   |
| IVRT/RR                         | 0.145 $\pm$ 0.006    | 0.148 $\pm$ 0.007    | 0.140 $\pm$ 0.006    |
| LAV [ $\mu$ l]                  | 33.386 $\pm$ 2.309   | 37.668 $\pm$ 2.221   | 38.349 $\pm$ 2.416   |
| LA/Weight                       | 0.947 $\pm$ 0.089    | 0.889 $\pm$ 0.095    | 0.842 $\pm$ 0.048    |

**Supplemental Table 2. Kovacs analysis of Doppler mitral early flow predicts left ventricular diastolic stiffness.** Young denotes 3 month-old and aged denotes 21- 24 month-old mice. N = 6, 7, 4, 5 mice per young B6J, aged B6J, aged MCP-1KO, aged B6N group respectively. C denotes damping constant, k - spring constant and  $x_0$ - initial displacement. Data presented as a mean value  $\pm$  SEM.

| <b>Mice</b>         | <b>c [g/s]</b>      | <b>k [g/s<sup>2</sup>]</b> | <b><math>x_0</math> [cm]</b> |
|---------------------|---------------------|----------------------------|------------------------------|
| <b>Aged B6J</b>     | 195.15 $\pm$ 14.271 | 10417 $\pm$ 534.38         | -0.016 $\pm$ 0.0012          |
| <b>Aged MCP-1KO</b> | 154.64 $\pm$ 6.592  | 8992.7 $\pm$ 411.43        | -0.017 $\pm$ 0.0012          |
| <b>Aged B6N</b>     | 204.14 $\pm$ 14.973 | 7935.1 $\pm$ 800.13        | -0.023 $\pm$ 0.0036          |

# Supplemental Figure 1

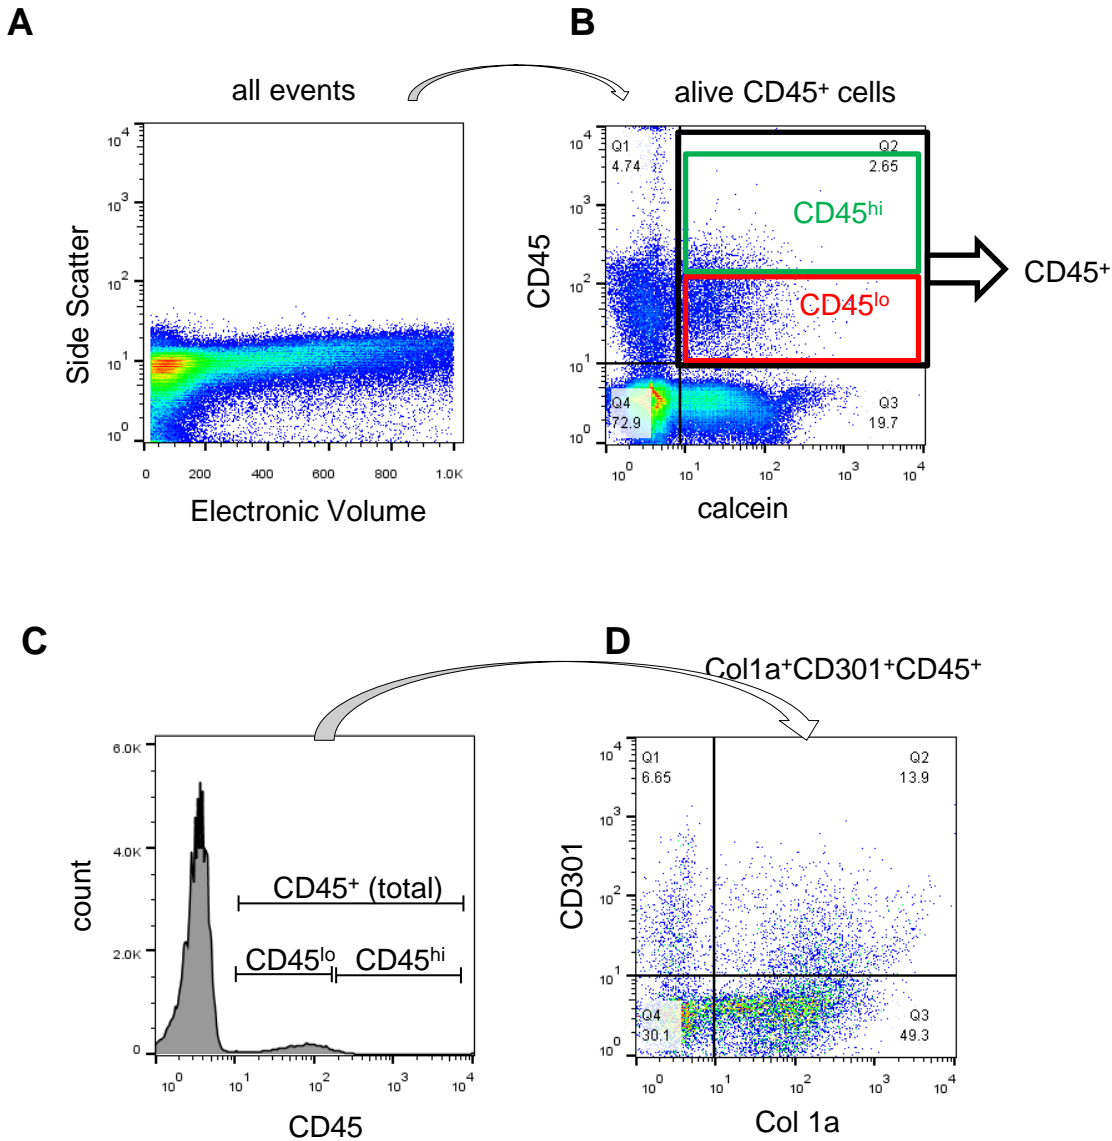

**Supplemental Figure 1. Flow cytometry gating strategy for a myeloid lineage.** **A**, Ungated events. **B**, Cells positive for calcein (alive) and CD45 were selected. Color coded frames point to CD45<sup>lo</sup>, CD45<sup>hi</sup> and CD45<sup>+</sup> (total) populations. **C**, Fixed and permeabilized cells were gated based on their expression of CD45<sup>+</sup>. **D**, Double positive cells (Col1a<sup>+</sup>CD301<sup>+</sup>) on CD45<sup>+</sup> gated population. To calculate the number of M2a macrophages/myeloid fibroblasts in all non-myocytes we used the following formula:  $\text{Col1a}^+\text{CD301}^+\text{CD45}^+$  (from D)  $\times$   $\text{CD45}^+\text{calcein}^+$  (from B) / 100 = % of Col1a<sup>+</sup>CD301<sup>+</sup>CD45<sup>+</sup> in all non-myocytes. Same strategy was used to calculate number of Col1a<sup>+</sup>CD301<sup>+</sup>CD45<sup>lo</sup> and Col1a<sup>+</sup>CD301<sup>+</sup>CD45<sup>hi</sup>. A and B shows alive cells; C and D depict fixed and permeabilized cells.

# Supplemental Figure 2

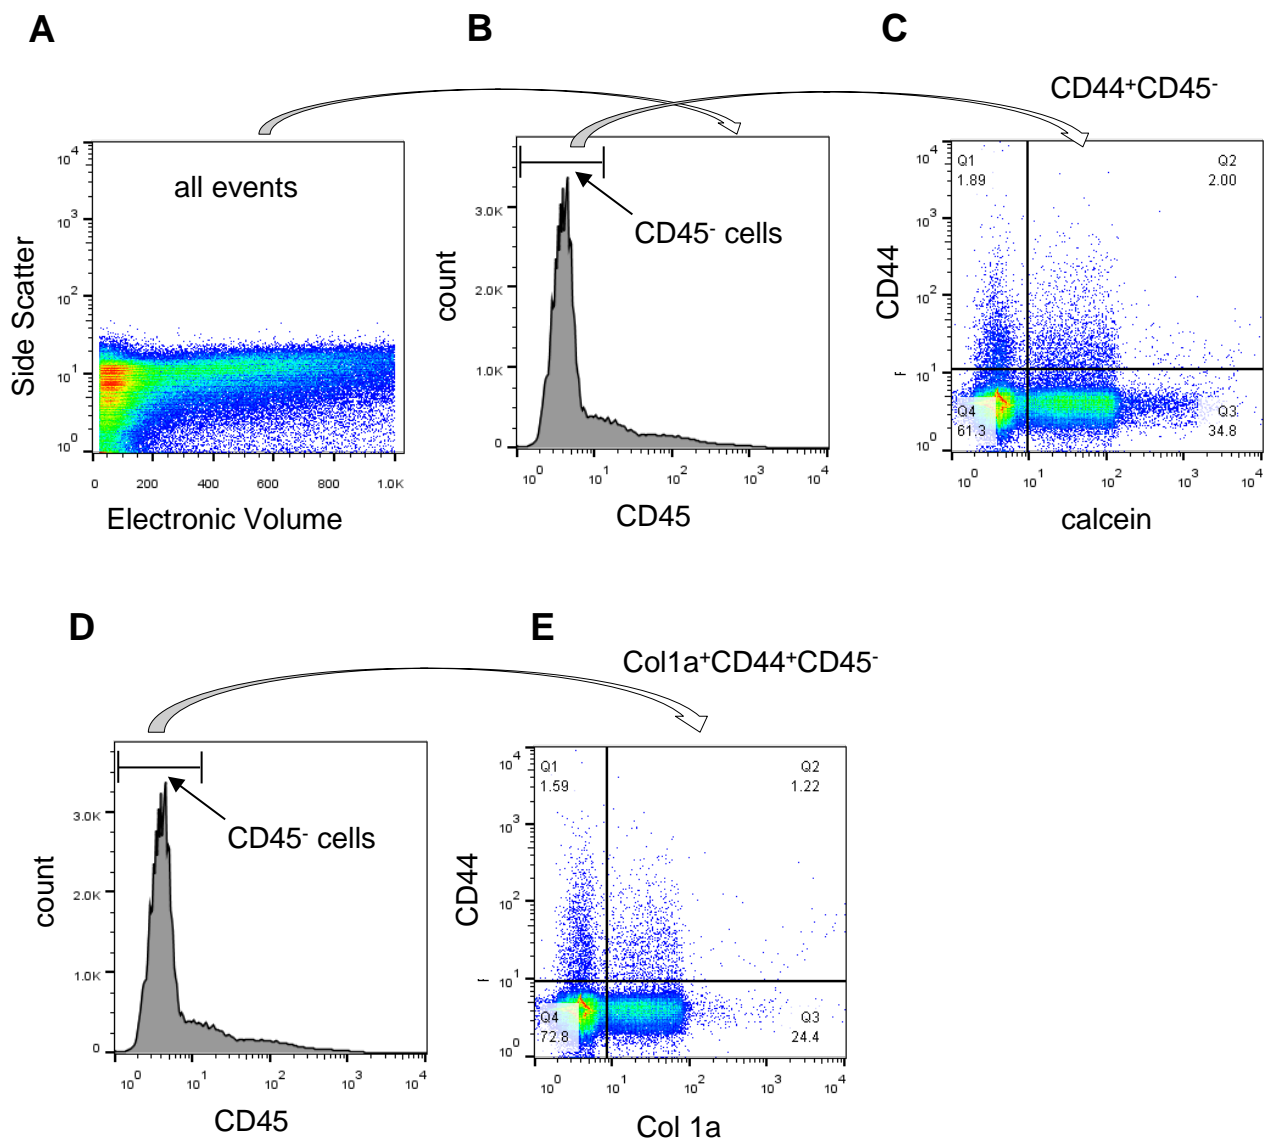

**Supplemental Figure 2. Flow cytometry gating strategy for the mesenchymal lineage.** **A**, Ungated events. **B**, Cells of non-myeloid origin selected (CD45<sup>-</sup>). **C**, Gated on CD45<sup>-</sup> population, CD44<sup>+</sup>calcein<sup>+</sup> cells are selected. **D**, Fixed and permeabilized cells gated based on CD45<sup>-</sup> population. **E**, Double positive cells (Col1a<sup>+</sup>CD44<sup>+</sup>) analyzed on CD45<sup>-</sup> gated population. To calculate the number of mesenchymal fibroblasts in all non-myocytes we used the following formula: Col1a<sup>+</sup>CD44<sup>+</sup>CD45<sup>-</sup> (from E) x CD44<sup>+</sup>calcein<sup>+</sup>CD45<sup>-</sup> (from B) / 100 = % of Col1a<sup>+</sup>CD44<sup>+</sup>CD45<sup>-</sup> in all non-myocytes. A, B and C shows alive cells; D and E depict fixed and permeabilized cells.
